# Supplementary material for: Identification and functional analysis of glycemic trait loci in the China Health and Nutrition Survey
Source: PubMed Central journal article supplement (PMC5886383; doi:10.1371/journal.pgen.1007275), 2018-04-05

Figure S12A

|                      | - | NKX6.1 | PDX1 | MEF2 | ETS1 | ERG1 | ELK4 | FOXA2 | FO XO3 | NKX2.2 |
|----------------------|---|--------|------|------|------|------|------|-------|--------|--------|
| MIN6 Nuclear Extract | C | C      | C    | C    | C    | C    | C    | C     | C      | C      |
|                      | + | +      | +    | +    | +    | +    | +    | +     | +      | +      |
| Lane                 | 1 | 2      | 3    | 4    | 5    | 6    | 7    | 8     | 9      | 10     |

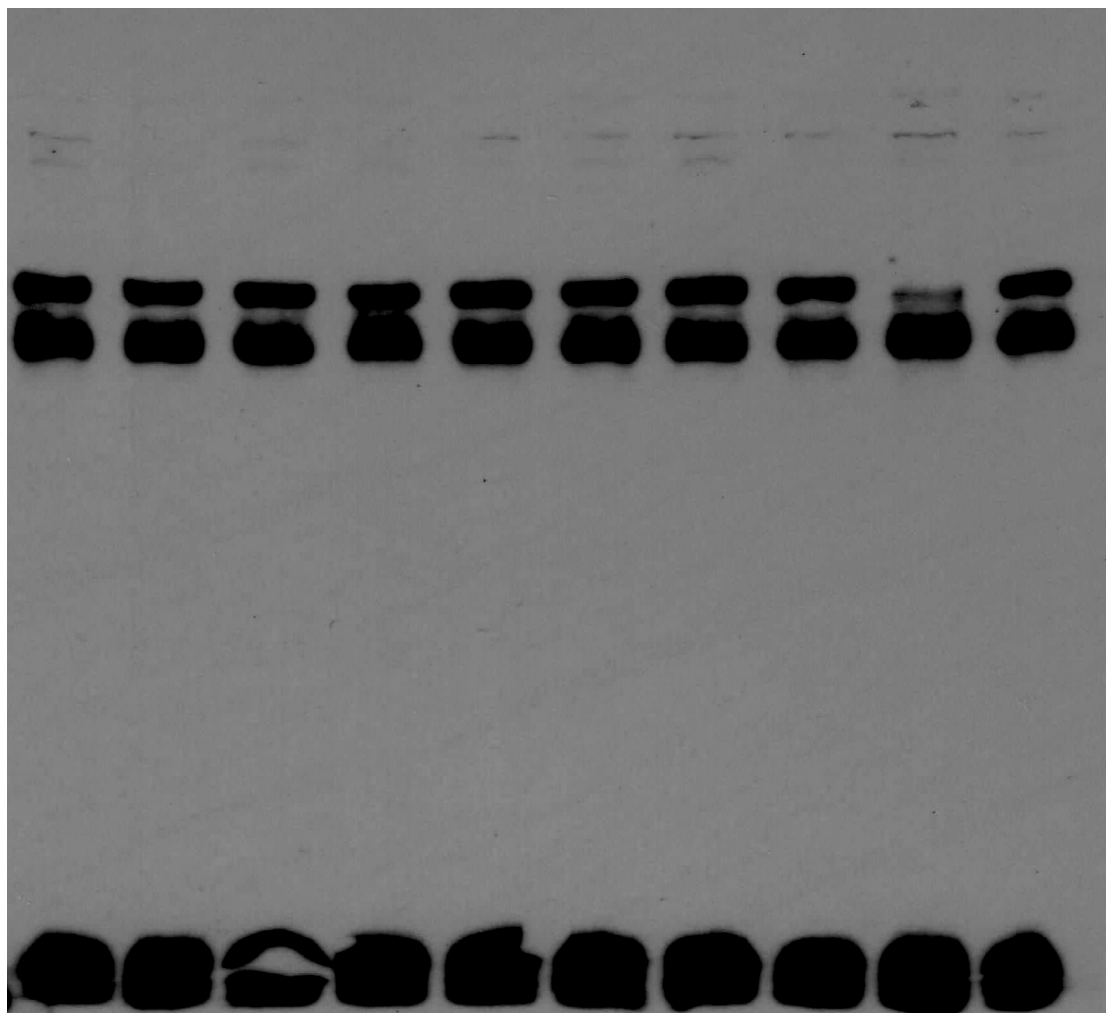

Figure S12B

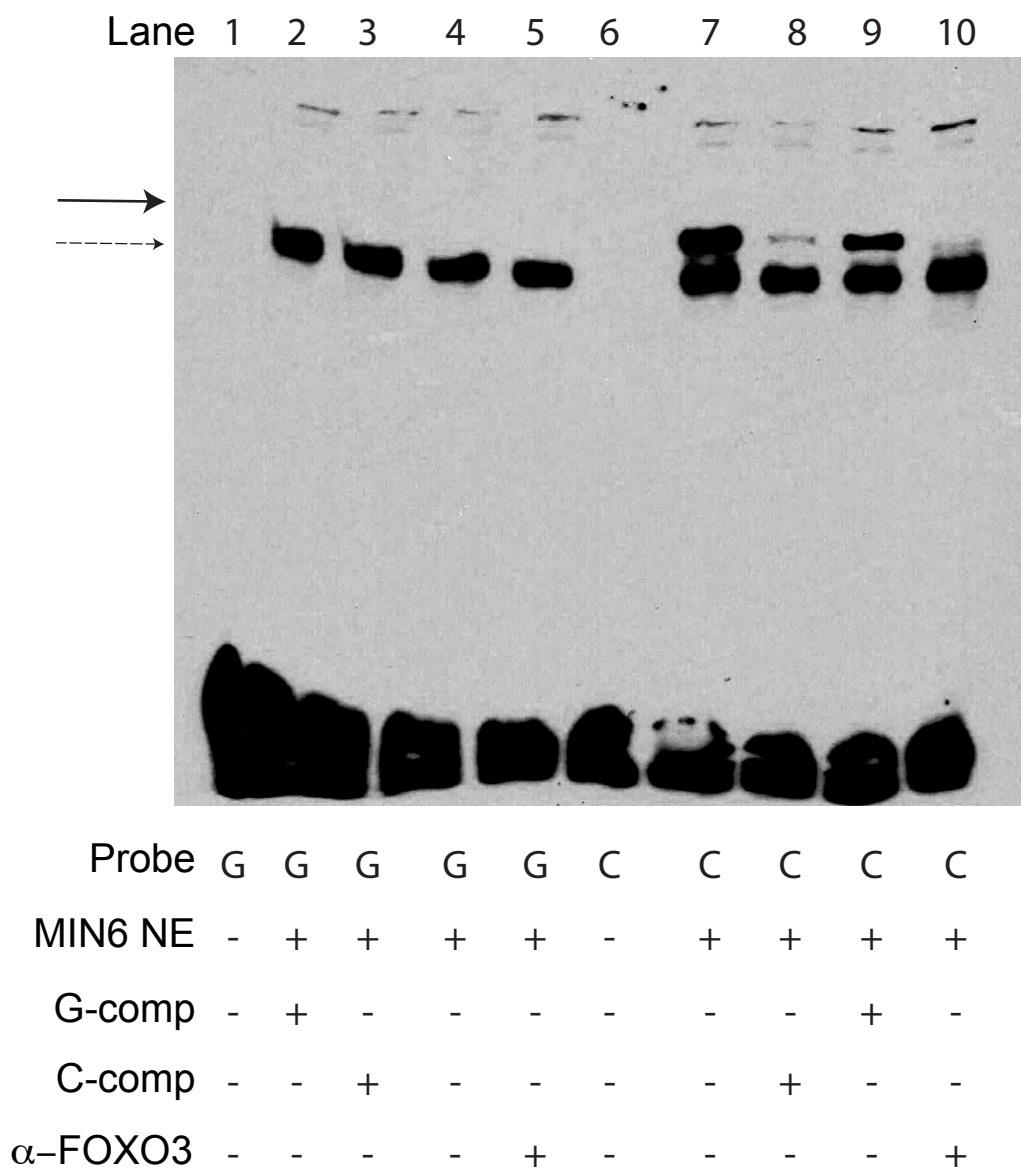

Supplement: pgen.1007275.s013.pdf [file pgen.1007275.s013.pdf]
